# Supplementary material for: Loss of NAMPT in aging retinal pigment epithelium reduces NAD+ availability and promotes cellular senescence
Source: PubMed Central journal article supplement (PMC6046249; doi:10.18632/aging.101469), 2018-06-12
Supplement: aging-10-101469-s001.pdf [file aging-10-101469-s001.pdf]

SUPPLEMENTARY MATERIAL

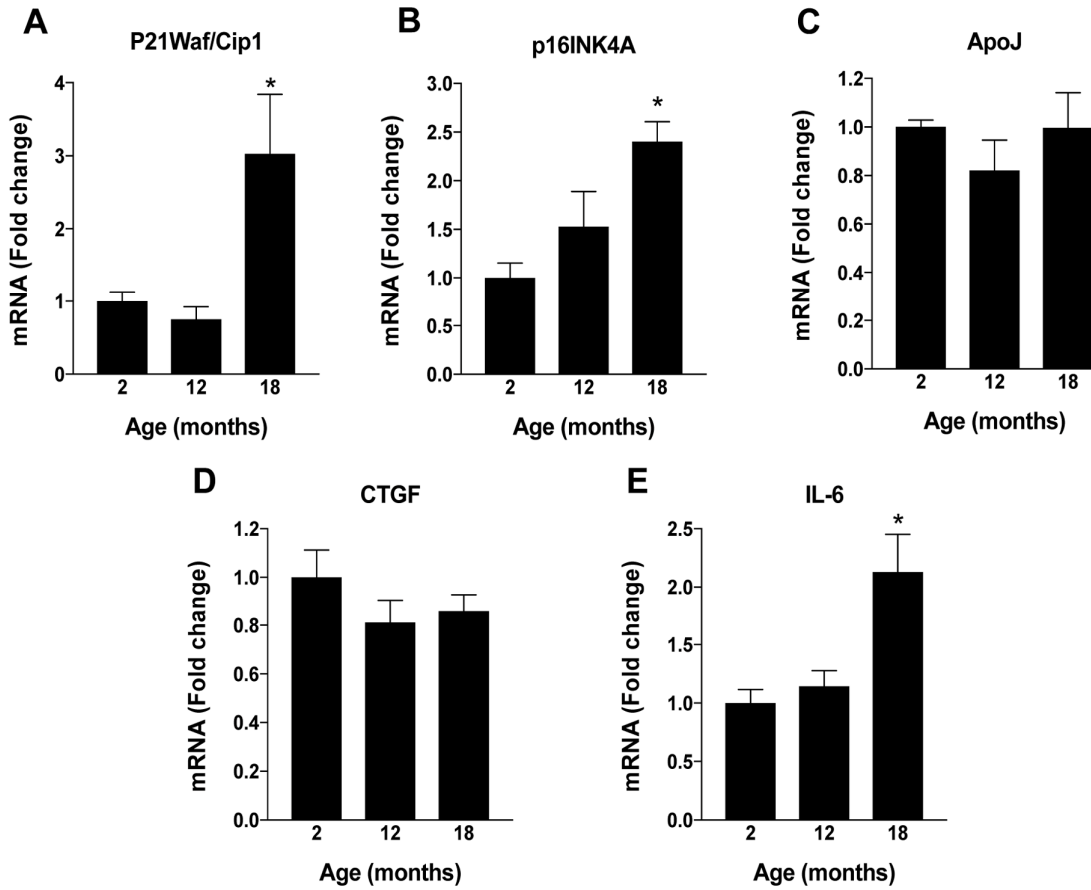

**Figure S1. Changes in RPE senescence markers with aging in mice.** RPE/eye cup was dissected from 2, 12 and 18 months old male C57BL/6J mice to evaluate changes in the expression of various senescence markers. (A-E) Changes in mRNA expression of markers associated with senescence were performed by qPCR. Data is presented as mean  $\pm$  S.E.M for n=5. mRNA expression of genes were normalized to 18s expression. \*p<0.05 compared to 2M (two months old mice).

**Table S1. Primer sequences used for qPCR.**

| <i>Mus musculus</i> |                         |                          |
|---------------------|-------------------------|--------------------------|
| <i>p21Waf/cip1</i>  | TATCCAGACATTCAGAGCCAC   | CGAAGTCAAAGTTCACCGT      |
| <i>p16ink4a</i>     | TCTTGGTCACTGTGAGGATTCA  | GAACGTTGCCCATCATCATCA    |
| <i>Ctgf</i>         | TCCACCCGAGTTACCAATGA    | TGCACTTTTGCCCTTCTTA      |
| <i>ApoJ</i>         | TAGGCTTCCAGAAAGCTCCT    | ATAGCGCTCTGCTCAAGTACA    |
| <i>IL-6</i>         | CTTCTGGAGTACCATAGC      | TCTGTTAGGAGAGCATTG       |
| <i>18s</i>          | CCAGAGCGAAAGCATTGCCAAGA | AGCATGCCAGAGTCTCGTTCGTTA |
